# Supplementary figures and images for: CXCR7 is an active component of SDF-1 signalling in astrocytes and Schwann cells
Source: Oxford University Press journal article supplement (doi:10.1242/jcs.062810), 2010-03-03

A

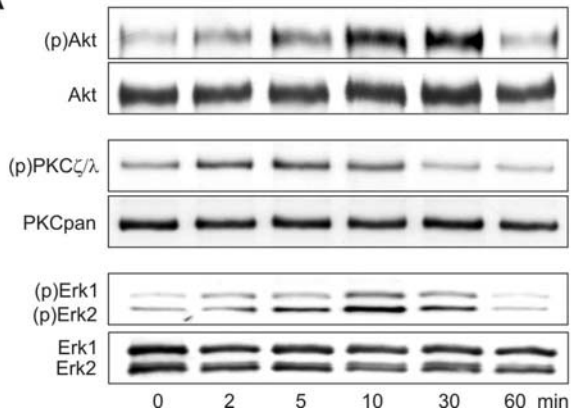

B

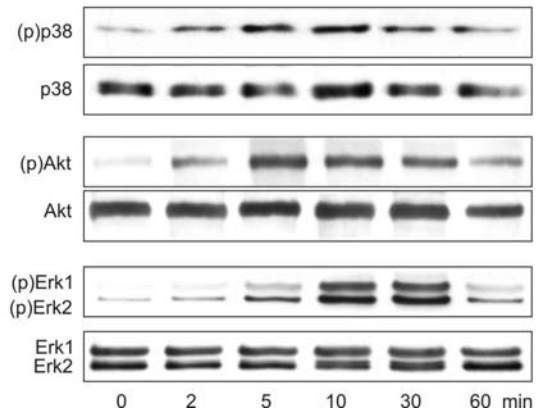

Supplement: jcs062810-sup-062810figs1.pdf [file jcs062810-sup-062810figs1.pdf]

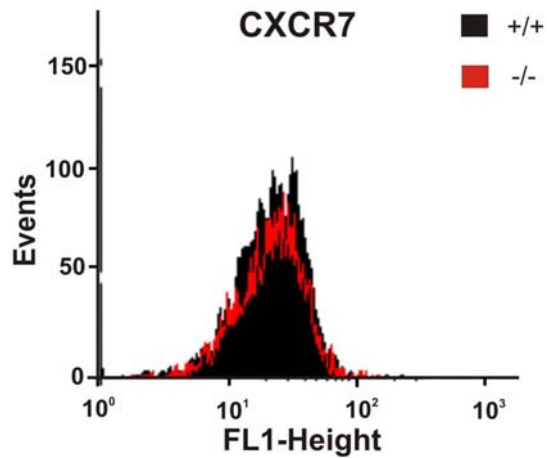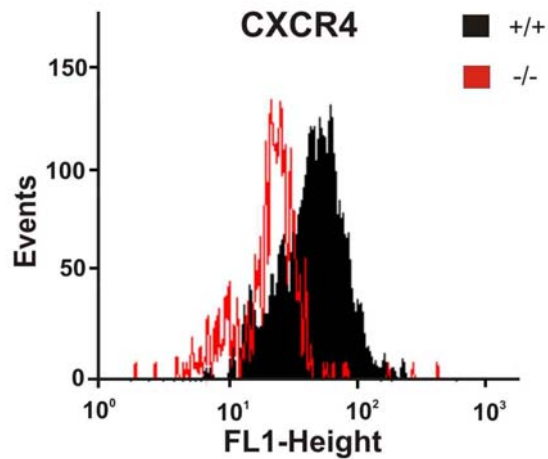

Supplement: jcs062810-sup-062810figs2.pdf [file jcs062810-sup-062810figs2.pdf]

(p)Erk1  
(p)Erk2

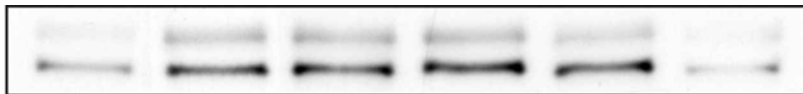

Erk1  
Erk2

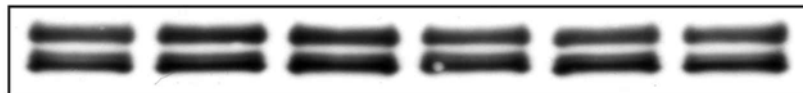

(p)Akt

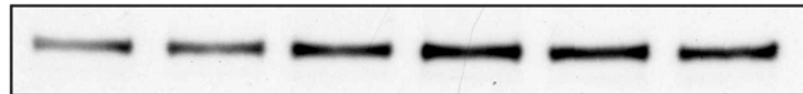

Akt

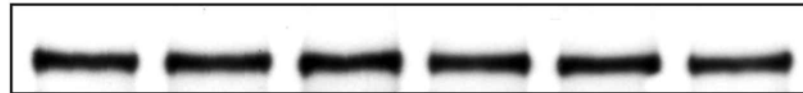

0

2

5

10

30

60 min

Supplement: jcs062810-sup-062810figs3.pdf [file jcs062810-sup-062810figs3.pdf]

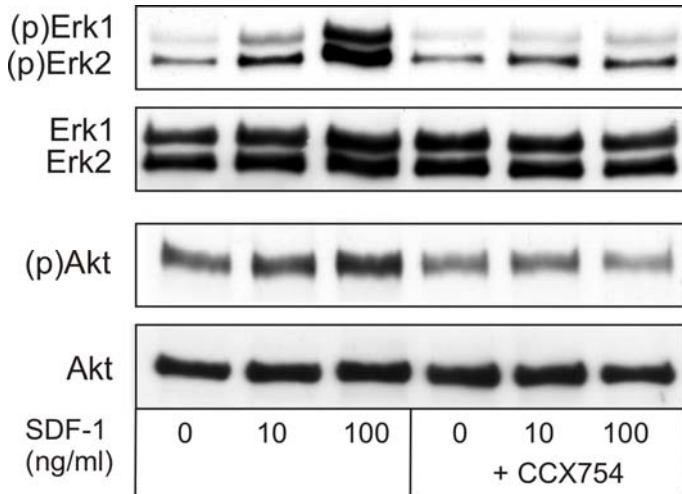

Supplement: jcs062810-sup-062810figs4.pdf [file jcs062810-sup-062810figs4.pdf]
